# Supplementary material
Source: publisher figshare collection journal article supplement (https://gsajournals.figshare.com/ndownloader/files/26176895)
Supplement: Supplementary file 1 [file 26176895]

| **Table 1: List of accession used in analysis** | | | | | | | | | |
| --- | --- | --- | --- | --- | --- | --- | --- | --- | --- |
| **Accession** |  |  | **Paired/Single Sequencing** | **Replicate** | **Tissue** | **Description** | **total reads** | **mapped reads** | **Ref** |
| *Run1* | *Run2* | *Run3* |  |  |  |  |  |  |  |
| SRR5177530 |  |  | paired | rep1 | Hypha | Vegetative hypha | 32325580 | 31741851 | (1) |
| SRR5177529 |  |  | paired | rep2 | Hypha | Vegetative hypha | 38796027 | 38146518 | (1) |
| SRR5177528 |  |  | paired | rep1 | Perithecia | 3-dpf Perithecia | 27664762 | 26741407 | (1) |
| SRR5177527 |  |  | paired | rep2 | Perithecia | 3-dpf Perithecia | 32857537 | 31242712 | (1) |
| SRR5177526 |  |  | paired | rep1 | Perithecia | 4-dpf Perithecia | 35768086 | 31463412 | (1) |
| SRR5177525 |  |  | paired | rep2 | Perithecia | 4-dpf Perithecia | 37853182 | 35392322 | (1) |
| SRR5177524 |  |  | paired | rep1 | Perithecia | 5-dpf Perithecia | 35942321 | 33844670 | (1) |
| SRR5177522 |  |  | paired | rep1 | Perithecia | 6-dpf Perithecia | 37050858 | 35631548 | (1) |
| SRR5177521 |  |  | paired | rep2 | Perithecia | 6-dpf Perithecia | 33168301 | 31397580 | (1) |
| SRR400660 |  |  | single | rep3 | mycelium | Sucrose 4h | 67488726 | 65138966 | (2) |
| SRR400659 |  |  | single | rep2 | mycelium | Sucrose 4h | 91200470 | 86830127 | (2) |
| SRR400658 |  |  | single | rep1 | mycelium | Sucrose 4h | 14805960 | 14150647 | (2) |
| SRR400657 |  |  | single | rep3 | mycelium | Sucrose 1h | 79141911 | 71683811 | (2) |
| SRR400656 |  |  | single | rep2 | mycelium | Sucrose 1h | 85948194 | 79236659 | (2) |
| SRR400655 |  |  | single | rep1 | mycelium | Sucrose 1h | 20033088 | 19207525 | (2) |
| SRR400654 |  |  | single | rep3 | mycelium | No carbon 4h | 185052310 | 177218220 | (2) |
| SRR400653 |  |  | single | rep2 | mycelium | No carbon 4h | 186502846 | 177721133 | (2) |
| SRR400652 |  |  | single | rep1 | mycelium | No carbon 4h | 65277122 | 60153039 | (2) |
| SRR400651 |  |  | single | rep3 | mycelium | No carbon 1h | 70273990 | 63679879 | (2) |
| SRR400650 |  |  | single | rep3 | mycelium | Avicel 4h | 61959507 | 59094103 | (2) |
| SRR400649 |  |  | single | rep2 | mycelium | Avicel 4h | 67436200 | 63365999 | (2) |
| SRR400648 |  |  | single | rep1 | mycelium | Avicel 4h | 14246506 | 13675648 | (2) |
| SRR400647 |  |  | single | rep1 | mycelium | Avicel 30min | 23467362 | 22616184 | (2) |
| SRR400646 |  |  | single | rep1 | mycelium | Avicel 2h | 25069798 | 24275536 | (2) |
| SRR400645 |  |  | single | rep3 | mycelium | Avicel 1h | 88526620 | 81761225 | (2) |
| SRR400644 |  |  | single | rep2 | mycelium | Avicel 1h | 84325373 | 78346622 | (2) |
| SRR400643 |  |  | single | rep1 | mycelium | Avicel 1h | 20228437 | 19259645 | (2) |
| SRR2007029 |  |  | single | rep3 | mycelium | 16h VMM 4h Xylan | 22608464 | 21342162 | (3) |
| SRR2007028 |  |  | single | rep2 | mycelium | 16h VMM 4h Xylan | 18819307 | 17662424 | (3) |
| SRR2007027 |  |  | single | rep1 | mycelium | 16h VMM 4h Xylan | 12374053 | 11561412 | (3) |
| SRR447485 |  |  | single | rep3 | mycelium | Sucrose 4h | 67488723 | 65138965 | (4) |
| SRR447484 |  |  | single | rep2 | mycelium | Sucrose 4h | 91200355 | 86830013 | (4) |
| SRR447483 |  |  | single | rep1 | mycelium | Sucrose 4h | 14805960 | 14150646 | (4) |
| SRR447482 |  |  | single | rep3 | mycelium | No Carbon 4h | 185052218 | 177218129 | (4) |
| SRR447481 |  |  | single | rep2 | mycelium | No Carbon 4h | 186502844 | 177721131 | (4) |
| SRR447480 |  |  | single | rep1 | mycelium | No Carbon 4h | 65277117 | 60153036 | (4) |
| SRR447479 |  |  | single | rep3 | mycelium | Avicel 4h | 61959510 | 59094107 | (4) |
| SRR447478 |  |  | single | rep2 | mycelium | Avicel 4h | 67436197 | 63365998 | (4) |
| SRR447477 |  |  | single | rep1 | mycelium | Avicel 4h | 14246506 | 13675648 | (4) |
| SRR447473 |  |  | single | rep1 | mycelium | Cellobiose 4h | 70608426 | 67455130 | (4) |
| SRR585669 |  |  | single | rep1 | Perithecia | Perithecia 0hr | 24981907 | 23189227 | (5) |
| SRR585670 |  |  | single | rep1 | Perithecia | Perithecia 2hr | 32130912 | 30286211 | (5) |
| SRR585671 |  |  | single | rep1 | Perithecia | Perithecia 24hr | 32221403 | 31007945 | (5) |
| SRR585672 |  |  | single | rep1 | Perithecia | Perithecia 48hr | 28317548 | 24735658 | (5) |
| SRR585673 |  |  | single | rep1 | Perithecia | Perithecia 72hr | 31035523 | 28866840 | (5) |
| SRR585674 |  |  | single | rep1 | Perithecia | Perithecia 96hr | 23368271 | 22844060 | (5) |
| SRR585675 |  |  | single | rep1 | Perithecia | Perithecia 120hr | 33366395 | 31245060 | (5) |
| SRR585676 |  |  | single | rep1 | Perithecia | Perithecia 144hr | 28306227 | 27752150 | (5) |
| SRR585661 |  |  | single | rep1 | Perithecia | Perithecia 0hr | 25772659 | 15288602 | (5) |
| SRR585662 |  |  | single | rep1 | Perithecia | Perithecia 2hr | 29504208 | 18864166 | (5) |
| SRR585663 |  |  | single | rep1 | Perithecia | Perithecia 24hr | 25566769 | 15351629 | (5) |
| SRR585664 |  |  | single | rep1 | Perithecia | Perithecia 48hr | 24823248 | 14953684 | (5) |
| SRR585665 |  |  | single | rep1 | Perithecia | Perithecia 72hr | 26994389 | 17762032 | (5) |
| SRR585666 |  |  | single | rep1 | Perithecia | Perithecia 96hr | 25083301 | 16523959 | (5) |
| SRR585667 |  |  | single | rep1 | Perithecia | Perithecia 120hr | 28724370 | 17350970 | (5) |
| SRR585668 |  |  | single | rep1 | Perithecia | Perithecia 144hr | 25062103 | 14640015 | (5) |
| SRR1562554 |  |  | single | rep1 | Mycelium | Sucrose 16 h | 25360474 | 24814760 | (6) |
| SRR1562553 |  |  | single | rep1 | Mycelium | WheatStraw 30 h | 24791246 | 24310708 | (6) |
| SRR1562552 |  |  | single | rep1 | Mycelium | SoybeanStraw 30 h | 24794780 | 24289408 | (6) |
| SRR1562551 |  |  | single | rep1 | Mycelium | RiceStraw 30 h | 25264219 | 24784739 | (6) |
| SRR1562550 |  |  | single | rep1 | Mycelium | CornStraw 30 h | 23828112 | 23317926 | (6) |
| SRR1562549 |  |  | single | rep1 | Mycelium | BarleyStraw 30 h | 23667296 | 23204861 | (6) |
| SRR676517 |  |  | single | rep1 | Mycelium | No Carbon | 65277117 | 60153035 | (7) |
| SRR676518 |  |  | single | rep2 | Mycelium | No Carbon | 186502844 | 177721130 | (7) |
| SRR676519 |  |  | single | rep3 | Mycelium | No Carbon | 185052357 | 177218259 | (7) |
| SRR676514 |  |  | single | rep1 | Mycelium | Avicel | 14246506 | 13675648 | (7) |
| SRR676515 |  |  | single | rep2 | Mycelium | Avicel | 67436207 | 63366006 | (7) |
| SRR676516 |  |  | single | rep3 | Mycelium | Avicel | 61959507 | 59094103 | (7) |
| SRR1055994 |  |  | single | rep2 | Mycelium | 240 min light exposure | 16960890 | 10220915 | (8) |
| SRR1055993 |  |  | single | rep2 | Mycelium | 120 min light exposure | 15835594 | 12274447 | (8) |
| SRR1055992 |  |  | single | rep2 | Mycelium | 60 min light exposure | 15914674 | 12576574 | (8) |
| SRR1055991 |  |  | single | rep2 | Mycelium | 15 min light exposure | 14691061 | 11862170 | (8) |
| SRR1055990 |  |  | single | rep2 | Mycelium | Dark only | 16821169 | 13390393 | (8) |
| SRR1055989 |  |  | single | rep1 | Mycelium | 240 min light exposure | 48622071 | 40260120 | (8) |
| SRR1055988 |  |  | single | rep1 | Mycelium | 120 min light exposure | 43562430 | 38205249 | (8) |
| SRR1055987 |  |  | single | rep1 | Mycelium | 60 min light exposure | 47560747 | 40972059 | (8) |
| SRR1055986 |  |  | single | rep1 | Mycelium | 15 min light exposure | 41288186 | 35658304 | (8) |
| SRR1055985 |  |  | single | rep1 | Mycelium | Dark only | 43738233 | 37668579 | (8) |
| SRR627948 |  |  | single | rep3 | mycelium | Sucrose 4h | 67488722 | 65138963 | (9) |
| SRR627947 |  |  | single | rep2 | mycelium | Sucrose 4h | 91200477 | 86830134 | (9) |
| SRR627946 |  |  | single | rep1 | mycelium | Sucrose 4h | 14805960 | 14150647 | (9) |
| SRR627945 |  |  | single | rep3 | mycelium | No Carbon 4h | 185049503 | 177215406 | (9) |
| SRR627944 |  |  | single | rep2 | mycelium | No Carbon 4h | 186502847 | 177721139 | (9) |
| SRR627943 |  |  | single | rep1 | mycelium | No Carbon 4h | 65277119 | 60153037 | (9) |
| SRR627942 |  |  | single | rep3 | mycelium | Avicel 4h | 61959510 | 59094107 | (9) |
| SRR627941 |  |  | single | rep2 | mycelium | Avicel 4h | 67436198 | 63365999 | (9) |
| SRR627940 |  |  | single | rep1 | mycelium | Avicel 4h | 14246506 | 13675648 | (9) |
| SRR627939 |  |  | single | rep1 | mycelium | Xylan 4h | 12374054 | 11561077 | (9) |
| SRR627938 |  |  | single | rep2 | mycelium | Orange Peel Powder 4h | 150008421 | 141772267 | (9) |
| SRR627937 |  |  | single | rep1 | mycelium | Orange Peel Powder 4h | 153619422 | 144815067 | (9) |
| SRR627936 |  |  | single | rep3 | mycelium | Pectin 4h | 143287245 | 138072441 | (9) |
| SRR627935 |  |  | single | rep2 | mycelium | Pectin 4h | 125365883 | 118403906 | (9) |
| SRR627934 |  |  | single | rep1 | mycelium | Pectin 4h | 138390353 | 132239214 | (9) |
| SRR8315453 |  |  | single | rep1 | Mycelium | No Iron | 12654417 | 12263988 | (10) |
| SRR8315454 |  |  | single | rep2 | Mycelium | No Iron | 12908947 | 12472334 | (10) |
| SRR8315449 |  |  | single | rep1 | Mycelium | Std cond | 14630354 | 14075998 | (10) |
| SRR8315450 |  |  | single | rep2 | Mycelium | Std cond | 14005650 | 13542577 | (10) |
| SRR8065400 | SRR8065401 |  | paired | rep2 | Mycelium | constant light 24 h- dark for 24 h - 30 min of constant light | 62076792 | 31429902 | (11) |
| SRR8065399 | SRR8065398 |  | paired | rep1 | Mycelium | constant light 24 h- dark for 24 h - 30 min of constant light | 66436386 | 42416775 | (11) |
| SRR8065397 | SRR8065396 |  | paired | rep2 | Mycelium | constant light 24 h- dark for 24 h | 80518911 | 22825098 | (11) |
| SRR8065395 | SRR8065394 |  | paired | rep1 | Mycelium | constant light 24 h- dark for 24 h | 72457057 | 18053826 | (11) |
| SRR2952644 |  |  | single | rep1 | conidia | VMM + Chitosan 16h | 181254563 | 175514293 | (12) |
| SRR2952643 |  |  | single | rep1 | conidia | VMM + Chitosan 8h | 196561030 | 192029011 | (12) |
| SRR2952642 |  |  | single | rep1 | conidia | VMM with chitosan 4 h | 202093822 | 197806834 | (12) |
| SRR2952640 |  |  | single | rep1 | conidia | VMM 16h | 201909013 | 197218022 | (12) |
| SRR2952639 |  |  | single | rep1 | conidia | VMM 8h | 206497934 | 203216664 | (12) |
| SRR2952641 |  |  | single | rep1 | conidia | VMM 4h | 202704918 | 198969066 | (12) |
| SRR1594012 |  |  | paired | rep1 | Hypha | VMM + Avicel 36 h + DTT (5mM) for 1 h | 15427238 | 15191294 | (13) |
| SRR1594011 |  |  | paired | rep1 | Hypha | VMM + Avicel 36 h + H2O for 1 h | 16255311 | 16007632 | (13) |
| SRR1594004 |  |  | single | rep1 | Hypha | VMM 16 h + Avicel 4 h + DTT(5mM) for 1 h | 22443031 | 22025488 | (13) |
| SRR1594003 |  |  | single | rep1 | Hypha | VMM 16 h + Avicel 4 h + H2O for 1 h | 22458730 | 22095661 | (13) |
| SRR1594002 |  |  | single | rep1 | Hypha | VMM + Avicel 36 h + tunicamycin (40ug/mL) for 1 h | 23346852 | 22971695 | (13) |
| SRR1594001 |  |  | single | rep1 | Hypha | VMM + Avicel 36 h + tunicamycin (5ug/mL) for 1 h | 24744756 | 24376774 | (13) |
| SRR1594000 |  |  | single | rep1 | Hypha | VMM + Avicel 36 h +DTT (5mM) for 1 h | 24863644 | 24493112 | (13) |
| SRR1593999 |  |  | single | rep1 | Hypha | VMM + Avicel 36 h + DTT (0.1mM) for 1 h | 23434570 | 23062813 | (13) |
| SRR1593998 |  |  | single | rep1 | Hypha | VMM + Avicel 36 h + H2O for 1 h | 25788342 | 25426319 | (13) |
| SRR7082735 |  |  | single | rep1 | mycelium | Constant light 6 h - 11 h light/dark cycles - constant dark for 22 h | 16648414 | 16417655 | (14) |
| SRR7082734 |  |  | single | rep1 | mycelium | Constant light 6 h - 11 h light/dark cycles - constant dark for 20 h | 15864578 | 15597009 | (14) |
| SRR7082733 |  |  | single | rep1 | mycelium | Constant light 6 h - 11 h light/dark cycles - constant dark for 18 h | 7909276 | 7852815 | (14) |
| SRR7082732 |  |  | single | rep1 | mycelium | Constant light 6 h - 11 h light/dark cycles - constant dark for 16 h | 11255900 | 11052456 | (14) |
| SRR7082731 |  |  | single | rep1 | mycelium | Constant light 6 h - 11 h light/dark cycles - constant dark for 14 h | 11809137 | 11629355 | (14) |
| SRR7082730 |  |  | single | rep1 | mycelium | Constant light 6 h - 11 h light/dark cycles - constant dark for 12 h | 15353037 | 15085000 | (14) |
| SRR7082729 |  |  | single | rep1 | mycelium | Constant light 6 h - 11 h light/dark cycles - constant dark for 10 h | 26467666 | 25070029 | (14) |
| SRR7082728 |  |  | single | rep1 | mycelium | Constant light 6 h - 11 h light/dark cycles - constant dark for 8 h | 18891911 | 18058029 | (14) |
| SRR7082727 |  |  | single | rep1 | mycelium | Constant light 6 h - 11 h light/dark cycles - constant dark for 6 h | 24707762 | 23521477 | (14) |
| SRR7082726 |  |  | single | rep1 | mycelium | Constant light 6 h - 11 h light/dark cycles - constant dark for 4 h | 29860606 | 28487792 | (14) |
| SRR7082725 |  |  | single | rep1 | mycelium | Constant light 6 h - 11 h light/dark cycles - constant dark for 2 h | 17575255 | 17028281 | (14) |
| SRR7082724 |  |  | single | rep1 | mycelium | Constant light 6 h - 11 h light/dark cycles - constant dark for 0 h | 28448978 | 27256330 | (14) |
| SRR6764315 |  |  | single | Rep1 | mycelium | 1% BSA No Vogels No Carbon | 35794113 | 35167613 | (15) |
| SRR6764316 |  |  | single | rep2 | mycelium | 1% BSA No Vogels No Carbon | 35575299 | 34966936 | (15) |
| SRR6764319 |  |  | single | rep1 | mycelium | 1% Ground miscanthus No Vogels | 33379046 | 32850733 | (15) |
| SRR6764320 |  |  | single | rep2 | mycelium | 1% Ground miscanthus No Vogels | 37294499 | 36719964 | (15) |
| SRR6764321 |  |  | single | rep3 | mycelium | 1% Ground miscanthus No Vogels | 30240188 | 29753694 | (15) |
| SRR6764326 |  |  | single | rep3 | mycelium | 1% BSA No Vogels No Carbon | 36157642 | 35489853 | (15) |
| SRR6764329 |  |  | single | rep3 | mycelium | 2% Pectin | 34283960 | 33725173 | (15) |
| SRR6764334 |  |  | single | rep2 | mycelium | 2% Pectin | 32432627 | 31954097 | (15) |
| SRR6764333 |  |  | single | rep1` | mycelium | 2% Pectin | 34666626 | 34082198 | (15) |
| SRR6764335 |  |  | single | rep1 | mycelium | 2% Xylan | 32187664 | 31668804 | (15) |
| SRR6764336 |  |  | single | rep2 | mycelium | 2% Xylan | 39860983 | 39272511 | (15) |
| SRR6764337 |  |  | single | rep2 | mycelium | 2% Xylan | 39125428 | 38494188 | (15) |
| SRR5824389 |  |  | paired | rep3 | Hypha | Maple Sap 360 min (first hyphal branching) | 40837707 | 40817766 | (16) |
| SRR5824388 |  |  | paired | rep2 | Hypha | Maple Sap 360 min (first hyphal branching) | 68783543 | 68750513 | (16) |
| SRR5824387 |  |  | paired | rep1 | Hypha | Maple Sap 360 min (first hyphal branching) | 74590618 | 74549934 | (16) |
| SRR5824386 |  |  | paired | rep3 | Hypha | Maple Sap 240 min (doubling of long axis) | 48071661 | 48047279 | (16) |
| SRR5824385 |  |  | paired | rep2 | Hypha | Maple Sap 240 min (doubling of long axis) | 69730768 | 69687995 | (16) |
| SRR5824384 |  |  | paired | rep1 | Hypha | Maple Sap 240 min (doubling of long axis) | 92944494 | 92893753 | (16) |
| SRR5824383 |  |  | paired | rep3 | Hypha | Maple Sap 120 min (polar growth) | 69898855 | 69857442 | (16) |
| SRR5824382 |  |  | paired | rep2 | Hypha | Maple Sap 120 min (polar growth) | 85284128 | 85235578 | (16) |
| SRR5824381 |  |  | paired | rep1 | Hypha | Maple Sap 120 min (polar growth) | 70721144 | 70657696 | (16) |
| SRR5824380 |  |  | paired | rep3 | Hypha | Maple Sap 15 min (fresh conidia) | 76397653 | 76326953 | (16) |
| SRR5824379 |  |  | paired | rep2 | Hypha | Maple Sap 15 min (fresh conidia) | 73433768 | 73363537 | (16) |
| SRR5824378 |  |  | paired | rep1 | Hypha | Maple Sap 15 min (fresh conidia) | 73359082 | 73296616 | (16) |
| SRR5824377 |  |  | paired | rep3 | Hypha | Bird 360 min (first hyphal branching) | 72632181 | 72582024 | (16) |
| SRR5824376 |  |  | paired | rep2 | Hypha | Bird 360 min (first hyphal branching) | 69470163 | 69422800 | (16) |
| SRR5824375 |  |  | paired | rep1 | Hypha | Bird 360 min (first hyphal branching) | 73153840 | 73096840 | (16) |
| SRR5824374 |  |  | paired | rep3 | Hypha | Bird 240 min (doubling of long axis) | 65618705 | 65565395 | (16) |
| SRR5824373 |  |  | paired | rep2 | Hypha | Bird 240 min (doubling of long axis) | 90724243 | 90651363 | (16) |
| SRR5824372 |  |  | paired | rep1 | Hypha | Bird 240 min (doubling of long axis) | 92141560 | 92085896 | (16) |
| SRR5824371 |  |  | paired | rep3 | Hypha | Bird 120 min (polar growth) | 65964234 | 65904948 | (16) |
| SRR5824370 |  |  | paired | rep2 | Hypha | Bird 120 min (polar growth) | 42849577 | 42806132 | (16) |
| SRR5824369 |  |  | paired | rep1 | Hypha | Bird 120 min (polar growth) | 82805689 | 82734622 | (16) |
| SRR5824368 |  |  | paired | rep3 | conidia | Bird 15 min (fresh conidia) | 79454916 | 79383349 | (16) |
| SRR5824367 |  |  | paired | rep2 | conidia | Bird 15 min (fresh conidia) | 75822291 | 75753494 | (16) |
| SRR5824366 |  |  | paired | rep1 | conidia | Bird 15 min (fresh conidia) | 95070913 | 94986563 | (16) |
| SRR5760434 |  |  | paired | rep3 | conidia | 5 hr germination + 10mM Pi | 35362279 | 31096485 | (17) |
| SRR5760433 |  |  | paired | rep2 | conidia | 5 hr germination + 10mM Pi | 29943629 | 26267039 | (17) |
| SRR5760432 |  |  | paired | rep1 | conidia | 5 hr germination + 10mM Pi | 53552104 | 47661852 | (17) |
| SRR5760431 |  |  | paired | rep3 | conidia | 5 hr germination + 10uM Pi | 38524725 | 33680750 | (17) |
| SRR5760430 |  |  | paired | rep2 | conidia | 5 hr germination + 10uM Pi | 33139222 | 28758187 | (17) |
| SRR5760429 |  |  | paired | rep1 | conidia | 5 hr germination + 10uM Pi | 40352560 | 35941143 | (17) |
| SRR1025976 |  |  | single | rep1 | conidia | Constant light for 6 h + staurosporine 1 hr | 13881322 | 13478385 | (18) |
| SRR1025975 | SRR1025974 | SRR1025973 |  | rep1 | conidia | Constant light for 6 h + DMSO for 1 hr | 16045818 | 15414333 | (18) |

**References**

1. Liu H, Li Y, Chen D, Qi Z, Wang Q, Wang J, Jiang C, Xu JR.2017. A-to-I RNA editing is developmentally regulated and generally adaptive for sexual reproduction in Neurospora crassa. Proc Natl Acad Sci U S A 114:E7756-E7765.10.1073/pnas.1702591114

2. Coradetti ST, Craig JP, Xiong Y, Shock T, Tian C, Glass NL.2012. Conserved and essential transcription factors for cellulase gene expression in ascomycete fungi. Proc Natl Acad Sci U S A 109:7397-402.10.1073/pnas.1200785109

3. Craig JP, Coradetti ST, Starr TL, Glass NL.2015. Direct target network of the Neurospora crassa plant cell wall deconstruction regulators CLR-1, CLR-2, and XLR-1. mBio 6:e01452-15.10.1128/mBio.01452-15

4. Znameroski EA, Coradetti ST, Roche CM, Tsai JC, Iavarone AT, Cate JH, Glass NL.2012. Induction of lignocellulose-degrading enzymes in Neurospora crassa by cellodextrins. Proc Natl Acad Sci U S A 109:6012-7.10.1073/pnas.1118440109

5. Wang Z, Lopez-Giraldez F, Lehr N, Farre M, Common R, Trail F, Townsend JP.2014. Global gene expression and focused knockout analysis reveals genes associated with fungal fruiting body development in Neurospora crassa. Eukaryot Cell 13:154-69.10.1128/EC.00248-13

6. Wang B, Cai P, Sun W, Li J, Tian C, Ma Y.2015. A transcriptomic analysis of Neurospora crassa using five major crop residues and the novel role of the sporulation regulator rca-1 in lignocellulase production. Biotechnol Biofuels 8:21.10.1186/s13068-015-0208-0

7. Coradetti ST, Xiong Y, Glass NL.2013. Analysis of a conserved cellulase transcriptional regulator reveals inducer-independent production of cellulolytic enzymes in Neurospora crassa. Microbiologyopen 2:595-609.10.1002/mbo3.94

8. Wu C, Yang F, Smith KM, Peterson M, Dekhang R, Zhang Y, Zucker J, Bredeweg EL, Mallappa C, Zhou X, Lyubetskaya A, Townsend JP, Galagan JE, Freitag M, Dunlap JC, Bell-Pedersen D, Sachs MS.2014. Genome-wide characterization of light-regulated genes in Neurospora crassa. G3 (Bethesda) 4:1731-45.10.1534/g3.114.012617

9. Benz JP, Chau BH, Zheng D, Bauer S, Glass NL, Somerville CR.2014. A comparative systems analysis of polysaccharide-elicited responses in Neurospora crassa reveals carbon source-specific cellular adaptations. Mol Microbiol 91:275-99.10.1111/mmi.12459

10. Bayram OS, Dettmann A, Karahoda B, Moloney NM, Ormsby T, McGowan J, Cea-Sanchez S, Miralles-Duran A, Brancini GTP, Luque EM, Fitzpatrick DA, Canovas D, Corrochano LM, Doyle S, Selker EU, Seiler S, Bayram O.2019. Control of Development, Secondary Metabolism and Light-Dependent Carotenoid Biosynthesis by the Velvet Complex of Neurospora crassa. Genetics 212:691-710.10.1534/genetics.119.302277

11. Zhu Q, Ramakrishnan M, Park J, Belden WJ.2019. Histone H3 lysine 4 methyltransferase is required for facultative heterochromatin at specific loci. BMC Genomics 20:350.10.1186/s12864-019-5729-7

12. Lopez-Moya F, Kowbel D, Nueda MJ, Palma-Guerrero J, Glass NL, Lopez-Llorca LV.2016. Neurospora crassa transcriptomics reveals oxidative stress and plasma membrane homeostasis biology genes as key targets in response to chitosan. Mol Biosyst 12:391-403.10.1039/c5mb00649j

13. Fan F, Ma G, Li J, Liu Q, Benz JP, Tian C, Ma Y.2015. Genome-wide analysis of the endoplasmic reticulum stress response during lignocellulase production in Neurospora crassa. Biotechnol Biofuels 8:66.10.1186/s13068-015-0248-5

14. Ananthasubramaniam B, Diernfellner A, Brunner M, Herzel H.2018. Ultradian Rhythms in the Transcriptome of Neurospora crassa. iScience 9:475-486.10.1016/j.isci.2018.11.012

15. Wu VW, Thieme N, Huberman LB, Dietschmann A, Kowbel DJ, Lee J, Calhoun S, Singan VR, Lipzen A, Xiong Y, Monti R, Blow MJ, O'Malley RC, Grigoriev IV, Benz JP, Glass NL.2020. The regulatory and transcriptional landscape associated with carbon utilization in a filamentous fungus. Proc Natl Acad Sci U S A 117:6003-6013.10.1073/pnas.1915611117

16. Wang Z, Miguel-Rojas C, Lopez-Giraldez F, Yarden O, Trail F, Townsend JP.2019. Metabolism and Development during Conidial Germination in Response to a Carbon-Nitrogen-Rich Synthetic or a Natural Source of Nutrition in Neurospora crassa. mBio 10.10.1128/mBio.00192-19

17. Martins MP, Gomes EV, Sanches PR, Pedersoli WR, Martinez-Rossi NM, Rossi A.2018. mus-52 disruption and metabolic regulation in Neurospora crassa: Transcriptional responses to extracellular phosphate availability. PLoS One 13:e0195871.10.1371/journal.pone.0195871

18. Goncalves AP, Hall C, Kowbel DJ, Glass NL, Videira A.2014. CZT-1 is a novel transcription factor controlling cell death and natural drug resistance in Neurospora crassa. G3 (Bethesda) 4:1091-102.10.1534/g3.114.011312
